# Supplementary material
Source: publisher figshare collection journal article supplement (https://gsapubs.figshare.com/articles/dataset/_/23669250)
Supplement: Supplementary file 1 [file 1]

## Sheet: Table S5
Table S5: Analyses of orthopyroxene grains in Lorena Butte harzburgite xenoliths (wt.%)
																			40.32	71.8464	50.9806	56.0794	60.0848	70.9374	75.9951	74.7094	61.9789	143.982	149.88		2	2	3	2	4	2	3	2	1	4	3				Cations per formula unit
Sample	SiO2	TiO2	Al2O3	Cr2O3	FeO	NiO	MnO	MgO	CaO	Na2O	K2O	P2O5	Total	Sum	Wo	En	Fs		MgO	FeO	Al2O3	CaO	SiO2	MnO	Cr2O3	NiO	Na2O	TiO2	V2O3		Mg	Fe	Al	Ca	Si	Mn	Cr	Ni	Na	Ti	V	Sum		Oxygens	Mg	Fe	Al	Ca	Si
lb2005opx 6	55.644	0.034	3.17	0.409	6.421	0.101	0.174	33.849	0.705	0.009	0.003	0	100.519	4.01326	0.0133533	0.891718	0.0949292		0.839509	0.0893712	0.0621805	0.0125715	0.926091	0.00245287	0.00538193	0.0013519	0.000145211	0.000236141	0		0.839509	0.0893712	0.0932707	0.0125715	1.85218	0.00245287	0.00807289	0.0013519	7.26053e-05	0.000472281	0	2.89933		6	1.73732	0.184949	0.128679	0.026016	1.9165
lb2005opx 7	55.297	0.048	3.018	0.411	6.136	0.044	0.101	33.466	0.694	0.025	0	0	99.24	4.00694	0.0133385	0.89461	0.0920515		0.83001	0.0854044	0.0591989	0.0123753	0.920316	0.00142379	0.00540824	0.000588949	0.000403363	0.000333375	0		0.83001	0.0854044	0.0887984	0.0123753	1.84063	0.00142379	0.00811237	0.000588949	0.000201681	0.00066675	0	2.86821		6	1.73629	0.178657	0.123838	0.0258878	1.9252
lb2005opx 8	55.473	0.024	3.218	0.504	6.396	0.079	0.168	32.525	0.669	0.013	0	0	99.069	3.99166	0.0131437	0.888773	0.0980838		0.806672	0.0890232	0.063122	0.0119295	0.923245	0.00236829	0.00663201	0.00105743	0.000209749	0.000166688	0		0.806672	0.0890232	0.094683	0.0119295	1.84649	0.00236829	0.00994801	0.00105743	0.000104874	0.000333375	0	2.86261		6	1.69078	0.186592	0.132303	0.0250041	1.93511
lb2005opx 9	55.234	0.049	3.265	0.484	6.319	0.107	0.185	32.651	0.68	0.037	0	0	99.011	3.99685	0.0133268	0.89001	0.0966634		0.809797	0.0879515	0.0640439	0.0121257	0.919267	0.00260793	0.00636883	0.00143222	0.000596977	0.00034032	0		0.809797	0.0879515	0.0960659	0.0121257	1.83853	0.00260793	0.00955325	0.00143222	0.000298488	0.000680641	0	2.85905		6	1.69944	0.184575	0.134403	0.0254469	1.92918
lb2005opx 10	55.718	0.046	3.178	0.413	6.209	0.075	0.146	32.662	0.615	0.042	0.005	0	99.109	3.989	0.012085	0.892681	0.0952337		0.810069	0.0864205	0.0623374	0.0109666	0.927323	0.00205815	0.00543456	0.00100389	0.00067765	0.000319484	0		0.810069	0.0864205	0.0935061	0.0109666	1.85465	0.00205815	0.00815184	0.00100389	0.000338825	0.000638969	0	2.8678		6	1.69482	0.180809	0.130422	0.0229443	1.94014
lb2007opx 9	56.089	0.065	2.924	0.55	5.824	0.129	0.151	34.179	0.895	0.056	0	0	100.862	4.01128	0.0168935	0.897301	0.0858056		0.847693	0.0810618	0.0573551	0.0159595	0.933497	0.00212864	0.00723731	0.00172669	0.000903533	0.000451445	0		0.847693	0.0810618	0.0860327	0.0159595	1.86699	0.00212864	0.010856	0.00172669	0.000451766	0.000902891	0	2.91381		6	1.74554	0.166919	0.118103	0.0328632	1.92222
lb2007opx 10	55.567	0.053	3.028	0.521	5.871	0.082	0.137	34.607	0.713	0.042	0	0	100.621	4.02199	0.0133448	0.900886	0.0857696		0.858309	0.081716	0.0593951	0.0127141	0.92481	0.00193128	0.00685571	0.00109759	0.00067765	0.000368102	0		0.858309	0.081716	0.0890926	0.0127141	1.84962	0.00193128	0.0102836	0.00109759	0.000338825	0.000736203	0	2.90584		6	1.77224	0.168728	0.12264	0.0262522	1.90956
lb2007opx 11	56.3	0.009	2.859	0.454	5.791	0.112	0.165	34.476	0.717	0.042	0.009	0	100.934	4.01134	0.0134804	0.901536	0.0849836		0.85506	0.0806025	0.0560801	0.0127854	0.937009	0.00232599	0.00597407	0.00149914	0.00067765	6.25078e-05	0		0.85506	0.0806025	0.0841202	0.0127854	1.87402	0.00232599	0.0089611	0.00149914	0.000338825	0.000125016	0	2.91984		6	1.75707	0.165631	0.11524	0.0262729	1.92547
lb2007opx 12	55.957	0.009	3.003	0.461	5.772	0.083	0.146	34.087	0.722	0.031	0.044	0	100.315	4.00788	0.0137165	0.900692	0.0855913		0.845412	0.0803381	0.0589047	0.0128746	0.9313	0.00205815	0.00606618	0.00111097	0.00050017	6.25078e-05	0		0.845412	0.0803381	0.0883571	0.0128746	1.8626	0.00205815	0.00909927	0.00111097	0.000250085	0.000125016	0	2.90223		6	1.74779	0.166089	0.121778	0.0266167	1.92535
lb2007opx 13	56.198	0.036	2.839	0.467	5.784	0.099	0.13	34.726	0.631	0.047	0	0	100.957	4.01516	0.0118066	0.903719	0.0844739		0.86126	0.0805051	0.0556878	0.0112519	0.935311	0.0018326	0.00614513	0.00132513	0.000758322	0.000250031	0		0.86126	0.0805051	0.0835317	0.0112519	1.87062	0.0018326	0.0092177	0.00132513	0.000379161	0.000500063	0	2.92043		6	1.76945	0.165397	0.11441	0.023117	1.92159
lb2011opx 6	55.55	0.056	3.269	0.428	5.935	0.09	0.118	33.765	0.657	0.095	0.004	0	99.967	4.00884	0.0125737	0.898768	0.0886579		0.837426	0.0826068	0.0641224	0.0117155	0.924527	0.00166344	0.00563194	0.00120467	0.00153278	0.000388938	0		0.837426	0.0826068	0.0961836	0.0117155	1.84905	0.00166344	0.00844791	0.00120467	0.000766389	0.000777875	0	2.88985		6	1.73869	0.171511	0.133133	0.0243242	1.91954
lb2011opx 7	55.779	0.08	3.364	0.505	6.093	0.078	0.164	33.818	0.918	0.125	0	0	100.924	4.01265	0.0174161	0.892357	0.0902272		0.83874	0.0848059	0.0659858	0.0163696	0.928338	0.0023119	0.00664517	0.00104405	0.00201681	0.000555625	0		0.83874	0.0848059	0.0989787	0.0163696	1.85668	0.0023119	0.00996775	0.00104405	0.00100841	0.00111125	0	2.91101		6	1.72876	0.174797	0.136006	0.0337401	1.91343
lb2011opx 8	55.177	0.053	3.123	0.492	6.036	0.105	0.151	33.814	0.695	0.057	0	0	99.703	4.0151	0.013254	0.896897	0.0898485		0.838641	0.0840126	0.0612585	0.0123931	0.918319	0.00212864	0.0064741	0.00140545	0.000919667	0.000368102	0		0.838641	0.0840126	0.0918878	0.0123931	1.83664	0.00212864	0.00971115	0.00140545	0.000459834	0.000736203	0	2.87801		6	1.74837	0.175147	0.12771	0.0258369	1.91448
lb2011opx 9	55.367	0.037	3.332	0.511	5.936	0.123	0.158	34.403	0.906	0.085	0.003	0	100.861	4.02538	0.0169698	0.896246	0.0867841		0.853249	0.0826207	0.0653581	0.0161557	0.921481	0.00222732	0.00672412	0.00164638	0.00137143	0.000256977	0		0.853249	0.0826207	0.0980372	0.0161557	1.84296	0.00222732	0.0100862	0.00164638	0.000685717	0.000513953	0	2.90818		6	1.76037	0.170458	0.134843	0.0333314	1.90115
lb2011opx 10	55.993	0.048	3.294	0.47	5.945	0.107	0.157	34.239	0.692	0.064	0	0	101.009	4.01216	0.013068	0.899302	0.0876298		0.849182	0.082746	0.0646128	0.0123396	0.9319	0.00221322	0.00618461	0.00143222	0.00103261	0.000333375	0		0.849182	0.082746	0.0969191	0.0123396	1.8638	0.00221322	0.00927691	0.00143222	0.000516304	0.00066675	0	2.91909		6	1.74544	0.170079	0.132807	0.0253633	1.91546
lb2011opx 11	55.67	0.044	3.306	0.457	6.055	0.116	0.16	34.249	0.71	0.087	0	0	100.854	4.01797	0.0133781	0.897569	0.0890532		0.84943	0.084277	0.0648481	0.0126606	0.926524	0.00225551	0.00601355	0.00155268	0.0014037	0.000305594	0		0.84943	0.084277	0.0972722	0.0126606	1.85305	0.00225551	0.00902032	0.00155268	0.000701851	0.000611188	0	2.91083		6	1.7509	0.173718	0.133669	0.0260969	1.90981
lb2013opx 5	56.004	0	2.511	0.403	5.611	0.115	0.142	34.089	0.644	0.012	0	0	99.531	4.00478	0.0122815	0.904196	0.0835226		0.845461	0.0780972	0.049254	0.0114837	0.932083	0.00200176	0.00530297	0.0015393	0.000193614	0	0		0.845461	0.0780972	0.073881	0.0114837	1.86417	0.00200176	0.00795446	0.0015393	9.68071e-05	0	0	2.88468		6	1.75852	0.162438	0.102446	0.0238856	1.93869
lb2013opx 6	55.313	0.066	2.569	0.432	5.584	0.105	0.151	34.644	0.674	0.01	0	0	99.548	4.02208	0.012665	0.905434	0.0819011		0.859226	0.0777214	0.0503917	0.0120187	0.920582	0.00212864	0.00568458	0.00140545	0.000161345	0.000458391	0		0.859226	0.0777214	0.0755875	0.0120187	1.84116	0.00212864	0.00852687	0.00140545	8.06726e-05	0.000916781	0	2.87878		6	1.79082	0.161988	0.105027	0.0250495	1.91869
lb2013opx 7	56.019	0.06	2.6	0.493	5.527	0.068	0.131	34.357	0.572	0.011	0.004	0	99.842	4.00663	0.0108597	0.907235	0.0819049		0.852108	0.076928	0.0509998	0.0101998	0.932332	0.0018467	0.00648726	0.000910193	0.00017748	0.000416719	0		0.852108	0.076928	0.0764996	0.0101998	1.86466	0.0018467	0.00973089	0.000910193	8.87398e-05	0.000833438	0	2.89381		6	1.76675	0.159502	0.105742	0.0211482	1.93309
lb2013opx 8	56.209	0.048	2.7	0.445	5.644	0.077	0.148	34.261	0.708	0.044	0.013	0	100.297	4.00662	0.0134178	0.903092	0.08349		0.849727	0.0785565	0.0529613	0.012625	0.935495	0.00208635	0.00585564	0.00103066	0.000709919	0.000333375	0		0.849727	0.0785565	0.0794419	0.012625	1.87099	0.00208635	0.00878346	0.00103066	0.000354959	0.00066675	0	2.90426		6	1.75548	0.162292	0.109414	0.0260823	1.93267
lb2015opx11	56.528	0.027	2.641	0.484	5.578	0.089	0.142	34.222	0.804	0.066	0	0	100.581	4.00348	0.01524	0.902231	0.082529		0.84876	0.0776378	0.051804	0.0143368	0.940804	0.00200176	0.00636883	0.00119128	0.00106488	0.000187523	0		0.84876	0.0776378	0.077706	0.0143368	1.88161	0.00200176	0.00955325	0.00119128	0.000532439	0.000375047	0	2.9137		6	1.7478	0.159875	0.106677	0.0295229	1.93734
lb2015opx12	56.068	0.014	2.404	0.454	5.61	0.124	0.134	34.802	0.643	0	0	0	100.253	4.01585	0.0120352	0.906004	0.0819605		0.863145	0.0780832	0.0471552	0.0114659	0.933148	0.00188899	0.00597407	0.00165976	0	9.72344e-05	0		0.863145	0.0780832	0.0707327	0.0114659	1.8663	0.00188899	0.0089611	0.00165976	0	0.000194469	0	2.90243		6	1.78432	0.161416	0.0974808	0.0237027	1.92904
lb2015opx13	55.773	0.027	2.398	0.493	5.499	0.11	0.093	34.789	0.748	0.024	0	0	99.954	4.01924	0.0140005	0.905661	0.0803384		0.862822	0.0765383	0.0470375	0.0133382	0.928238	0.00131102	0.00648726	0.00147237	0.000387228	0.000187523	0		0.862822	0.0765383	0.0705562	0.0133382	1.85648	0.00131102	0.00973089	0.00147237	0.000193614	0.000375047	0	2.89281		6	1.78958	0.158748	0.0975606	0.0276649	1.92526
lb2015opx14	56.069	0.005	2.38	0.444	6.016	0.057	0.143	34.547	0.666	0.034	0.003	0	100.364	4.01593	0.0124692	0.899615	0.0879163		0.85682	0.0837342	0.0466844	0.011876	0.933164	0.00201586	0.00584248	0.000762956	0.000548573	3.47266e-05	0		0.85682	0.0837342	0.0700266	0.011876	1.86633	0.00201586	0.00876372	0.000762956	0.000274287	6.94531e-05	0	2.90067		6	1.77232	0.173203	0.096566	0.0245654	1.93024
lb2015opx15	55.993	0.055	2.314	0.487	5.868	0.083	0.131	34.886	0.684	0	0	0	100.501	4.0205	0.0127171	0.902126	0.0851572		0.865228	0.0816742	0.0453898	0.012197	0.9319	0.0018467	0.00640831	0.00111097	0	0.000381992	0		0.865228	0.0816742	0.0680847	0.012197	1.8638	0.0018467	0.00961246	0.00111097	0	0.000763984	0	2.90432		6	1.78747	0.16873	0.0937703	0.0251976	1.9252
lb2018opx14	55.715	0	2.485	0.423	5.54	0.072	0.147	33.94	0.697	0.051	0	0	99.07	4.00607	0.0133456	0.903858	0.0827968		0.841766	0.0771089	0.048744	0.0124288	0.927273	0.00207225	0.00556615	0.000963734	0.00082286	0	0		0.841766	0.0771089	0.073116	0.0124288	1.85455	0.00207225	0.00834922	0.000963734	0.00041143	0	0	2.87076		6	1.75932	0.161161	0.101877	0.0259767	1.93803
lb2018opx15	55.873	0.036	2.46	0.416	5.593	0.118	0.129	33.77	0.714	0	0.017	0	99.126	4.00096	0.0137179	0.902407	0.0838749		0.83755	0.0778466	0.0482536	0.0127319	0.929902	0.0018185	0.00547404	0.00157945	0	0.000250031	0		0.83755	0.0778466	0.0723804	0.0127319	1.8598	0.0018185	0.00821106	0.00157945	0	0.000500063	0	2.87242		6	1.7495	0.162608	0.100794	0.0265949	1.94241
lb2018opx16	56.129	0.017	2.409	0.506	5.614	0.111	0.128	33.69	0.69	0.005	0.003	0	99.302	3.99665	0.0132871	0.90233	0.0843825		0.835565	0.0781389	0.0472532	0.012304	0.934163	0.00180441	0.00665832	0.00148576	8.06726e-05	0.00011807	0		0.835565	0.0781389	0.0708798	0.012304	1.86833	0.00180441	0.00998749	0.00148576	4.03363e-05	0.000236141	0	2.87877		6	1.74151	0.162859	0.0984863	0.0256443	1.94701
lb2018opx17	56.154	0	2.561	0.451	5.74	0.074	0.144	34.564	0.647	0.028	0	0	100.363	4.0124	0.0121614	0.903623	0.0842153		0.857242	0.0798927	0.0502348	0.0115372	0.934579	0.00202996	0.00593459	0.000990505	0.000451766	0	0		0.857242	0.0798927	0.0753521	0.0115372	1.86916	0.00202996	0.00890189	0.000990505	0.000225883	0	0	2.90533		6	1.77035	0.164992	0.103743	0.0238263	1.93006
lb2018opx18	56.228	0.026	2.63	0.458	5.585	0.11	0.168	34.517	0.638	0	0	0	100.36	4.00897	0.0120365	0.90572	0.0822432		0.856076	0.0777353	0.0515882	0.0113767	0.935811	0.00236829	0.0060267	0.00147237	0	0.000180578	0		0.856076	0.0777353	0.0773823	0.0113767	1.87162	0.00236829	0.00904006	0.00147237	0	0.000361156	0	2.90743		6	1.76666	0.16042	0.106461	0.0234779	1.93121
lb2019opx7	55.556	0.049	2.43	0.403	6.071	0.087	0.137	34.118	0.637	0.068	0	0	99.556	4.01556	0.0120578	0.898244	0.0896987		0.846181	0.0844997	0.0476652	0.0113589	0.924627	0.00193128	0.00530297	0.00116451	0.00109715	0.00034032	0		0.846181	0.0844997	0.0714977	0.0113589	1.84925	0.00193128	0.00795446	0.00116451	0.000548573	0.000680641	0	2.87507		6	1.7659	0.176343	0.0994727	0.0237049	1.92961
lb2019opx8	55.641	0.037	2.341	0.428	6.147	0.089	0.121	34.376	0.626	0.021	0.008	0	99.835	4.01844	0.0117589	0.898114	0.090127		0.852579	0.0855575	0.0459194	0.0111627	0.926041	0.00170573	0.00563194	0.00119128	0.000338825	0.000256977	0		0.852579	0.0855575	0.0688791	0.0111627	1.85208	0.00170573	0.00844791	0.00119128	0.000169412	0.000513953	0	2.88229		6	1.7748	0.178103	0.0955894	0.0232372	1.92772
lb2019opx9	55.507	0.044	2.566	0.39	5.986	0.137	0.102	34.064	0.626	0.04	0	0	99.462	4.01375	0.0118838	0.899417	0.0886988		0.844841	0.0833166	0.0503328	0.0111627	0.923811	0.00143789	0.00513191	0.00183377	0.000645381	0.000305594	0		0.844841	0.0833166	0.0754992	0.0111627	1.84762	0.00143789	0.00769786	0.00183377	0.00032269	0.000611188	0	2.87435		6	1.76355	0.173918	0.105066	0.0233015	1.92839
lb2019opx10	55.769	0.056	2.764	0.41	6.162	0.086	0.137	34.011		0.058	0	0	100.135	4.00395	0	0.907708	0.092292		0.843527	0.0857663	0.0542167	0	0.928172	0.00193128	0.00539508	0.00115113	0.000935802	0.000388938	0		0.843527	0.0857663	0.081325	0	1.85634	0.00193128	0.00809263	0.00115113	0.000467901	0.000777875	0	2.87938		6	1.75772	0.178718	0.112976	0	1.93411
lb2024opx14	56.887	0.031	2.662	0.478	6.847	0.045	0.126	32.985	0.641	0.017	0.003	0	100.722	3.98676	0.0123595	0.884592	0.103049		0.81808	0.0953005	0.0522159	0.0114302	0.946779	0.00177621	0.00628988	0.000602334	0.000274287	0.000215305	0		0.81808	0.0953005	0.0783238	0.0114302	1.89356	0.00177621	0.00943482	0.000602334	0.000137143	0.000430609	0	2.90907		6	1.6873	0.196559	0.107696	0.023575	1.95274
lb2024opx15	56.973	0.01	2.652	0.479	6.647	0.122	0.175	32.98	0.663	0.023	0	0	100.724	3.98547	0.0128186	0.88687	0.100311		0.817956	0.0925168	0.0520197	0.0118225	0.94821	0.00246696	0.00630304	0.00163299	0.000371094	6.94531e-05	0		0.817956	0.0925168	0.0780296	0.0118225	1.89642	0.00246696	0.00945456	0.00163299	0.000185547	0.000138906	0	2.91062		6	1.68615	0.190715	0.107234	0.0243711	1.95465
lb2024opx16	57.065	0.032	2.595	0.429	6.605	0.09	0.152	32.986	0.643	0.029	0.019	0	100.645	3.98338	0.0124426	0.887794	0.0997633		0.818105	0.0919322	0.0509017	0.0114659	0.949741	0.00214273	0.0056451	0.00120467	0.000467901	0.00022225	0		0.818105	0.0919322	0.0763525	0.0114659	1.89948	0.00214273	0.00846765	0.00120467	0.00023395	0.0004445	0	2.90983		6	1.68691	0.189562	0.104958	0.0236424	1.95834
lb2024opx17	56.411	0.027	2.64	0.423	6.617	0.12	0.128	33.06	0.66	0.046	0	0	100.132	3.99285	0.0127397	0.887565	0.0996952		0.81994	0.0920993	0.0517844	0.011769	0.938856	0.00180441	0.00556615	0.00160622	0.000742188	0.000187523	0		0.81994	0.0920993	0.0776765	0.011769	1.87771	0.00180441	0.00834922	0.00160622	0.000371094	0.000375047	0	2.8917		6	1.7013	0.191097	0.107447	0.0244196	1.94803
lb2024opx18	56.995	0.037	2.624	0.444	6.476	0.124	0.121	33.254	0.657	0.025	0.007	0	100.764	3.98761	0.0126435	0.89008	0.0972764		0.824752	0.0901367	0.0514705	0.0117155	0.948576	0.00170573	0.00584248	0.00165976	0.000403363	0.000256977	0		0.824752	0.0901367	0.0772058	0.0117155	1.89715	0.00170573	0.00876372	0.00165976	0.000201681	0.000513953	0	2.91381		6	1.6983	0.185606	0.105986	0.0241242	1.95327
lb2024opx19	56.662	0.041	2.639	0.398	6.756	0.13	0.15	33.402	0.662	0	0	0	100.84	3.99642	0.0126353	0.886714	0.100651		0.828423	0.0940339	0.0517647	0.0118047	0.943034	0.00211454	0.00523718	0.00174008	0	0.000284758	0		0.828423	0.0940339	0.0776471	0.0118047	1.88607	0.00211454	0.00785577	0.00174008	0	0.000569516	0	2.91026		6	1.70794	0.193867	0.106722	0.0243374	1.94423
lb2027opx9	57.096	0.009	2.728	0.49	5.776	0.084	0.127	33.61	0.631	0	0.014	0	100.565	3.9848	0.0121612	0.900948	0.0868908		0.833581	0.0803937	0.0535105	0.0112519	0.950257	0.00179031	0.00644778	0.00112436	0	6.25078e-05	0		0.833581	0.0803937	0.0802658	0.0112519	1.90051	0.00179031	0.00967168	0.00112436	0	0.000125016	0	2.91872		6	1.71359	0.165265	0.110001	0.0231305	1.95344
lb2027opx10	56.828	0.007	2.736	0.494	5.961	0.101	0.113	33.708	0.678	0.037	0	0	100.663	3.99271	0.0129851	0.897904	0.089111		0.836012	0.0829687	0.0536674	0.01209	0.945797	0.00159295	0.00650042	0.0013519	0.000596977	4.86172e-05	0		0.836012	0.0829687	0.0805011	0.01209	1.89159	0.00159295	0.00975063	0.0013519	0.000298488	9.72344e-05	0	2.91626		6	1.72004	0.170702	0.110417	0.0248744	1.94591
lb2027opx11	57.061	0.019	2.968	0.525	5.88	0.12	0.11	33.036	1.202	0.051	0.005	0	100.977	3.98469	0.0232315	0.888063	0.0887052		0.819345	0.0818413	0.0582182	0.0214339	0.949674	0.00155066	0.00690834	0.00160622	0.00082286	0.000131961	0		0.819345	0.0818413	0.0873273	0.0214339	1.89935	0.00155066	0.0103625	0.00160622	0.00041143	0.000263922	0	2.92349		6	1.68158	0.167966	0.119484	0.0439897	1.94906
lb2027opx12	57.377	0	2.664	0.48	5.725	0.112	0.086	33.557	0.66	0.02	0	0	100.681	3.98095	0.0127409	0.900995	0.0862641		0.832267	0.0796839	0.0522551	0.011769	0.954934	0.00121234	0.0063162	0.00149914	0.00032269	0	0		0.832267	0.0796839	0.0783827	0.011769	1.90987	0.00121234	0.0094743	0.00149914	0.000161345	0	0	2.92432		6	1.70761	0.163492	0.107215	0.0241472	1.9593
lb2027opx13	57.113	0.007	2.619	0.445	5.791	0.064	0.13	33.843	0.679	0.033	0.005	0	100.729	3.98989	0.0129903	0.900533	0.0864768		0.83936	0.0806025	0.0513724	0.0121078	0.95054	0.0018326	0.00585564	0.000856653	0.000532439	4.86172e-05	0		0.83936	0.0806025	0.0770587	0.0121078	1.90108	0.0018326	0.00878346	0.000856653	0.000266219	9.72344e-05	0	2.92205		6	1.72351	0.165506	0.105486	0.0248617	1.9518
[truncated: 37 more columns]
