# Supplementary material
Source: publisher figshare collection journal article supplement (https://gsapubs.figshare.com/articles/dataset/_/23669250)
Supplement: Supplementary file 2 [file 1]

Table S3: Standard Reference Materials used for trace element abundance analyses (values in ppm)

| BHVO-2 Hawaiian Basalt USGS Standard |      |                  |           | BCR-2 Columbia River USGS Standard |  |      |                  | BIR-1a Icelandic Basalt USGS Standard |     |  |      | AGV-2 Guano Valley Andesite USGS Standard |           |      |  |      |                  |           |     |
|--------------------------------------|------|------------------|-----------|------------------------------------|--|------|------------------|---------------------------------------|-----|--|------|-------------------------------------------|-----------|------|--|------|------------------|-----------|-----|
|                                      | Rec. | Average<br>n = 8 | Std. dev. | RSD                                |  | Rec. | Average<br>n = 9 | Std. dev.                             | RSD |  | Rec. | Average<br>n = 5                          | Std. dev. | RSD  |  | Rec. | Average<br>n = 3 | Std. dev. | RSD |
| Li                                   |      | 5.04             | 0.92      | 18%                                |  |      | 9.13             | 0.18                                  | 2%  |  |      | 2.77                                      | 0.08      | 3%   |  |      | 10.67            | 0.17      | 2%  |
| Be                                   |      | 1.03             | 0.03      | 3%                                 |  |      | 2                | 0.05                                  | 3%  |  |      | 0.09                                      | 0.00      | 4%   |  |      | 2.10             | 0.03      | 1%  |
| B                                    |      | 0.93             | 0.06      | 7%                                 |  |      | 4.4              | 1.04                                  | 24% |  |      | 1.13                                      | 0.23      | 21%  |  |      | 13.93            | 8.26      | 59% |
| S                                    |      | 74.33            | 24.99     | 34%                                |  |      | 22.25            | 7.66                                  | 34% |  |      | 38.84                                     | 22.36     | 58%  |  |      |                  |           |     |
| Sc                                   |      | 41.67            | 16.46     | 39%                                |  |      | 33.53            | 1.11                                  | 3%  |  |      | 41.27                                     | 2.32      | 6%   |  |      | 12.80            | 0.31      | 2%  |
| Ti                                   |      | 16289.82         | 81.72     | 1%                                 |  |      | 13500            | 103.35                                | 1%  |  |      | 5732.59                                   | 87.14     | 2%   |  |      | 6223.15          | 78.01     | 1%  |
| V                                    |      | 319.97           | 4.24      | 1%                                 |  |      | 417.6            | 4.64                                  | 1%  |  |      | 326.24                                    | 5.83      | 2%   |  |      | 118.51           | 1.47      | 1%  |
| Cr                                   |      | 307.01           | 15.65     | 5%                                 |  |      | 15.85            | 0.69                                  | 4%  |  |      | 403.72                                    | 6.81      | 2%   |  |      | 16.62            | 0.45      | 3%  |
| Mn                                   |      | 1235.75          | 69.46     | 6%                                 |  |      | 1400             | 14.31                                 | 1%  |  |      | 1181.48                                   | 18.44     | 2%   |  |      | 700.59           | 5.45      | 1%  |
| Co                                   |      | 47.04            | 2.37      | 5%                                 |  |      | 37.33            | 0.48                                  | 1%  |  |      | 58.30                                     | 1.00      | 2%   |  |      | 15.94            | 0.40      | 2%  |
| Ni                                   |      | 115.56           | 2.22      | 2%                                 |  |      | 12.57            | 0.92                                  | 7%  |  |      | 165.91                                    | 3.84      | 2%   |  |      | 18.55            | 0.60      | 3%  |
| Cu                                   |      | 112.07           | 1.16      | 1%                                 |  |      | 19.66            | 3.74                                  | 19% |  |      | 105.27                                    | 1.14      | 1%   |  |      | 43.02            | 1.92      | 4%  |
| Zn                                   |      | 37.89            | 1.44      | 4%                                 |  |      | 129.5            | 13.13                                 | 10% |  |      | 58.80                                     | 9.78      | 17%  |  |      | 273.85           | 175.37    | 64% |
| Ga                                   |      | 21.90            | 1.41      | 6%                                 |  |      | 22.07            | 0.26                                  | 1%  |  |      | 14.77                                     | 0.25      | 2%   |  |      | 20.52            | 0.24      | 1%  |
| Ge                                   |      | 1.36             | 0.06      | 5%                                 |  |      | 1.46             | 0.05                                  | 3%  |  |      | 0.92                                      | 0.04      | 4%   |  |      | 1.07             | 0.04      | 3%  |
| Se                                   |      | 0.08             | 0.01      | 8%                                 |  |      | 0.082            | 0.01                                  | 6%  |  |      | 0.01                                      | 0.00      | 19%  |  |      | 0.07             | 0.00      | 7%  |
| Rb                                   |      | 13.06            | 7.62      | 58%                                |  |      | 46.02            | 0.30                                  | 1%  |  |      | 0.18                                      | 0.02      | 9%   |  |      | 65.97            | 0.49      | 1%  |
| Sr                                   |      | 448.12           | 117.64    | 26%                                |  |      | 337.4            | 1.80                                  | 1%  |  |      | 87.63                                     | 2.39      | 3%   |  |      | 651.15           | 9.54      | 1%  |
| Y                                    |      | 27.50            | 3.76      | 14%                                |  |      | 36.07            | 0.20                                  | 1%  |  |      | 13.82                                     | 0.21      | 2%   |  |      | 17.94            | 0.23      | 1%  |
| Zr                                   |      | 170.02           | 1.55      | 1%                                 |  |      | 186.5            | 1.39                                  | 1%  |  |      | 12.87                                     | 0.23      | 2%   |  |      | 231.91           | 1.43      | 1%  |
| Nb                                   |      | 18.17            | 0.31      | 2%                                 |  |      | 12.44            | 0.13                                  | 1%  |  |      | 0.55                                      | 0.01      | 2%   |  |      | 13.95            | 0.23      | 2%  |
| Sn                                   |      | 1.75             | 0.03      | 2%                                 |  |      | 2.28             | 0.02                                  | 1%  |  |      | 0.86                                      | 0.14      | 16%  |  |      | 2.06             | 0.10      | 5%  |
| Te                                   |      | 0.01             | 0.00      | 14%                                |  |      | 0.004            | 0.00                                  | 28% |  |      | 0.00                                      | 0.00      | 49%  |  |      | 0.00             | 0.00      | 29% |
| Cs                                   |      | 0.21             | 0.18      | 88%                                |  |      | 1.16             | 0.01                                  | 1%  |  |      | 0.00                                      | 0.00      | 7%   |  |      | 1.20             | 0.02      | 2%  |
| Ba                                   |      | 123.03           | 1.79      | 1%                                 |  |      | 683.9            | 5.87                                  | 1%  |  |      | 6.28                                      | 0.08      | 1%   |  |      | 1159.39          | 4.45      | 0%  |
| La                                   |      | 14.30            | 0.37      | 3%                                 |  |      | 25.08            | 0.24                                  | 1%  |  |      | 0.57                                      | 0.01      | 1%   |  |      | 38.13            | 0.27      | 1%  |
| Ce                                   |      | 37.98            | 0.51      | 1%                                 |  |      | 53.12            | 0.58                                  | 1%  |  |      | 1.76                                      | 0.02      | 1%   |  |      | 69.70            | 0.33      | 0%  |
| Pr                                   |      | 5.36             | 0.13      | 2%                                 |  |      | 6.827            | 0.08                                  | 1%  |  |      | 0.38                                      | 0.00      | 1%   |  |      | 8.19             | 0.07      | 1%  |
| Nd                                   |      | 24.14            | 0.51      | 2%                                 |  |      | 28.26            | 0.36                                  | 1%  |  |      | 2.36                                      | 0.03      | 1%   |  |      | 30.21            | 0.40      | 1%  |
| Sm                                   |      | 6.15             | 0.15      | 2%                                 |  |      | 6.547            | 0.07                                  | 1%  |  |      | 1.09                                      | 0.01      | 1%   |  |      | 5.55             | 0.09      | 2%  |
| Eu                                   |      | 2.02             | 0.04      | 2%                                 |  |      | 1.989            | 0.03                                  | 1%  |  |      | 0.50                                      | 0.01      | 2%   |  |      | 1.65             | 0.03      | 2%  |
| Gd                                   |      | 6.31             | 0.17      | 3%                                 |  |      | 6.811            | 0.10                                  |     |  |      | 1.69                                      | 0.03      | 2%   |  |      | 5.13             | 0.06      | 1%  |
| Tb                                   |      | 0.97             | 0.04      | 4%                                 |  |      | 1.077            | 0.02                                  | 2%  |  |      | 0.36                                      | 0.01      | 2%   |  |      | 0.67             | 0.01      | 2%  |
| Dy                                   |      | 5.47             | 0.30      | 5%                                 |  |      | 6.424            | 0.07                                  | 1%  |  |      | 2.57                                      | 0.05      | 2%   |  |      | 3.53             | 0.03      | 1%  |
| Ho                                   |      | 1.02             | 0.06      | 6%                                 |  |      | 1.313            | 0.02                                  | 1%  |  |      | 0.57                                      | 0.01      | 1%   |  |      | 0.69             | 0.01      | 1%  |
| Er                                   |      | 2.66             | 0.17      | 6%                                 |  |      | 3.67             | 0.05                                  | 1%  |  |      | 1.68                                      | 0.03      | 2%   |  |      | 1.89             | 0.02      | 1%  |
| Tm                                   |      | 0.36             | 0.02      | 6%                                 |  |      | 0.5341           | 0.01                                  | 2%  |  |      | 0.25                                      | 0.00      | 2%   |  |      | 0.26             | 0.00      | 1%  |
| Yb                                   |      | 2.11             | 0.18      | 8%                                 |  |      | 3.392            | 0.04                                  | 1%  |  |      | 1.65                                      | 0.03      | 2%   |  |      | 1.66             | 0.03      | 2%  |
| Lu                                   |      | 0.30             | 0.02      | 8%                                 |  |      | 0.5049           | 0.01                                  | 2%  |  |      | 0.25                                      | 0.01      | 2%   |  |      | 0.25             | 0.00      | 2%  |
| Hf                                   |      | 4.54             | 0.06      | 1%                                 |  |      | 4.972            | 0.08                                  | 2%  |  |      | 0.62                                      | 0.01      | 2%   |  |      | 5.31             | 0.10      | 2%  |
| Ta                                   |      | 1.17             | 0.00      | 0%                                 |  |      | 0.785            | 0.01                                  | 1%  |  |      | 0.04                                      | 0.00      | 5%   |  |      | 0.86             | 0.01      | 1%  |
| W                                    |      | 0.21             | 0.01      | 3%                                 |  |      | 0.465            | 0.01                                  | 2%  |  |      | 0.02                                      | 0.00      | 4%   |  |      | 0.47             | 0.01      | 1%  |
| Hg                                   |      | 0.00             | 0.00      | 39%                                |  |      | 0.0012           | 0.00                                  | 21% |  |      | 0.00                                      | 0.00      | -74% |  |      | 0.00             | 0.00      | 10% |
| Tl                                   |      | 0.02             | 0.01      | 26%                                |  |      | 0.267            | 0.00                                  | 1%  |  |      | 0.00                                      | 0.00      | 13%  |  |      | 0.28             | 0.00      | 1%  |
| Pb                                   |      | 1.51             | 0.08      | 5%                                 |  |      | 10.59            | 0.23                                  | 2%  |  |      | 3.43                                      | 0.59      | 17%  |  |      | 13.26            | 0.20      | 2%  |
| Th                                   |      | 1.28             | 0.15      | 11%                                |  |      | 5.828            | 0.10                                  | 2%  |  |      | 0.03                                      | 0.00      | 2%   |  |      | 6.03             | 0.08      | 1%  |
| U                                    |      | 0.42             | 0.01      | 2%                                 |  |      | 1.683            | 0.03                                  | 2%  |  |      | 0.02                                      | 0.00      | 13%  |  |      | 1.92             | 0.04      | 2%  |
